# Supplementary material for: ADAMTS12 promotes fibrosis by restructuring extracellular matrix to enable activation of injury-responsive fibroblasts
Source: PubMed Central journal article supplement (PMC11405035; doi:10.1172/jci170246), 2024-09-17
Supplement: jci-134-170246-s067.pdf [file jci-134-170246-s067.pdf]

# Full unedited Western Blots for Figure 6B

Anti-HA Western Blot

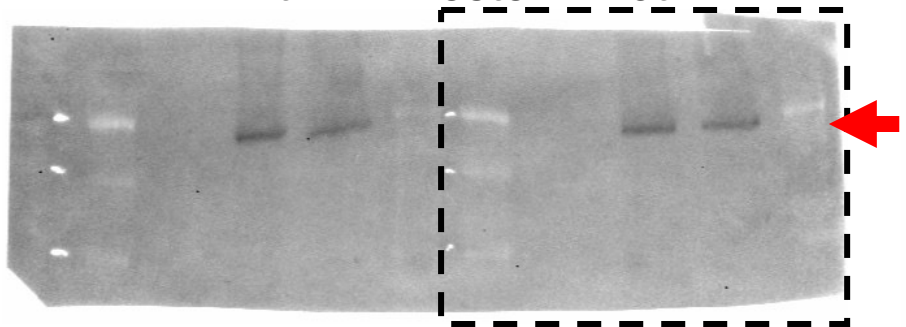

Anti-Tubulin Western Blot

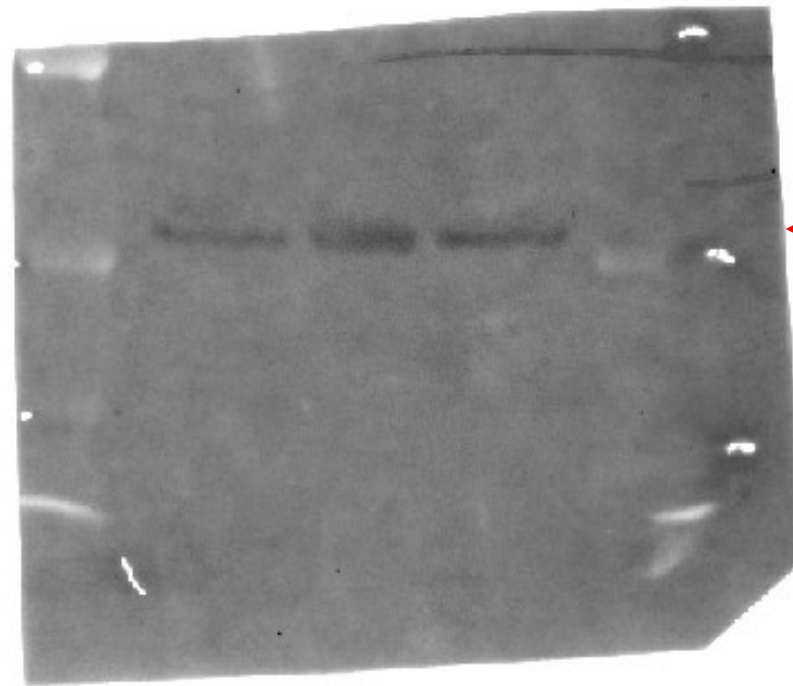

Anti-GFP Western Blot

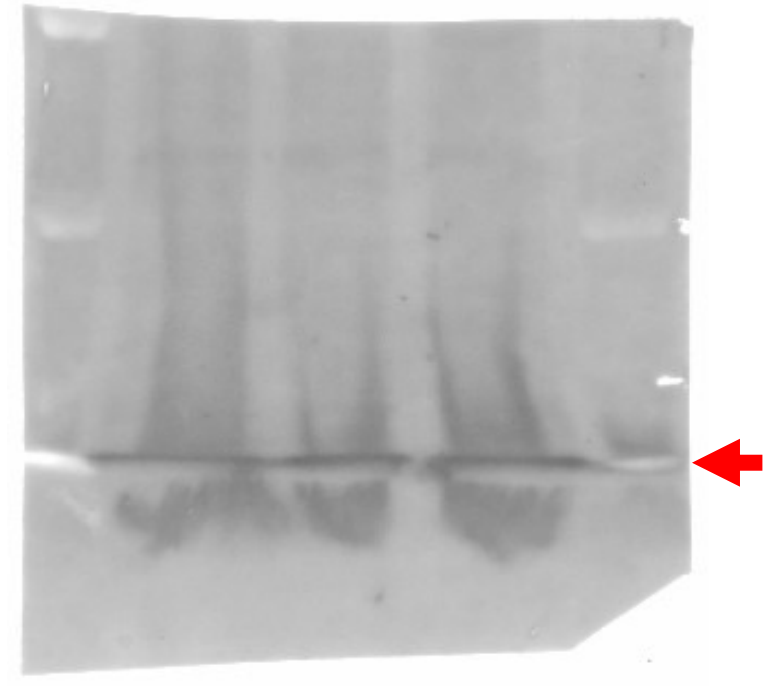

# Full unedited Western Blots for Figure 7B

Sham Samples

Anti-HMCN1 Western Blot

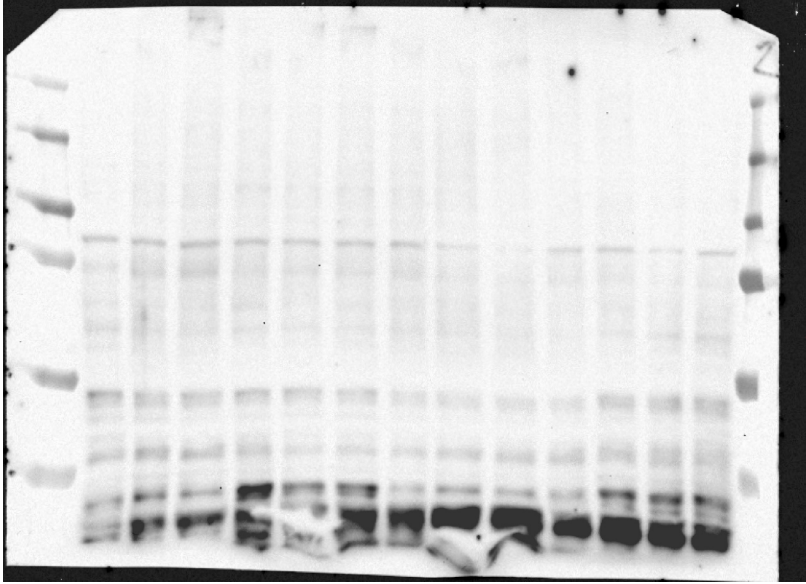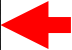

UUO Samples

Anti-HMCN1 Western Blot

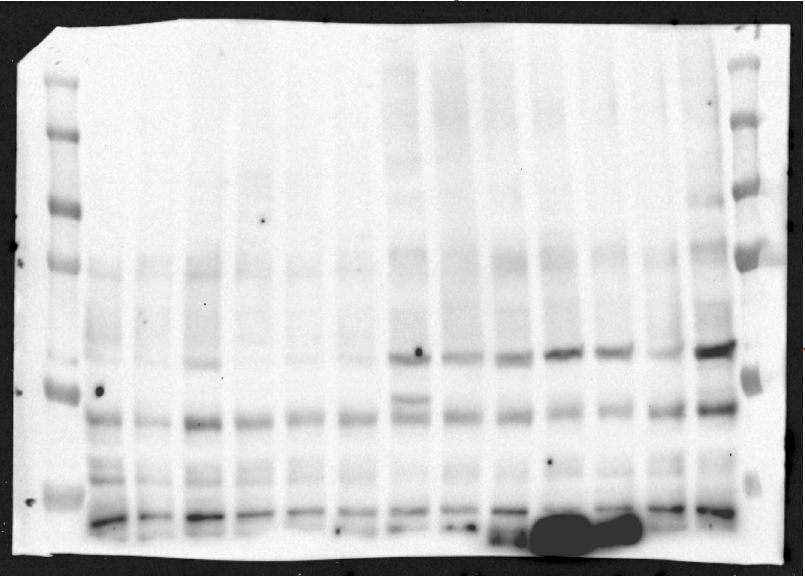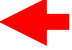

Anti-GAPDH Western Blot

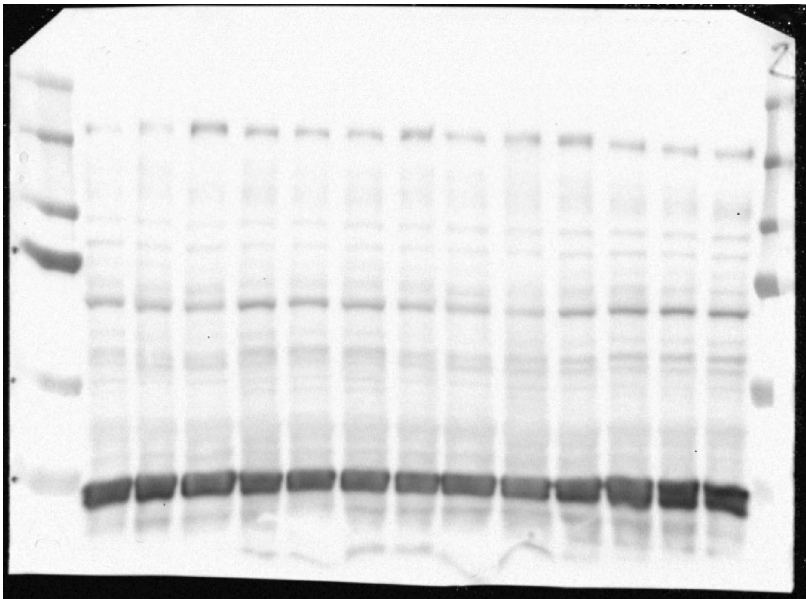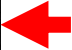

Anti-GAPDH Western Blot

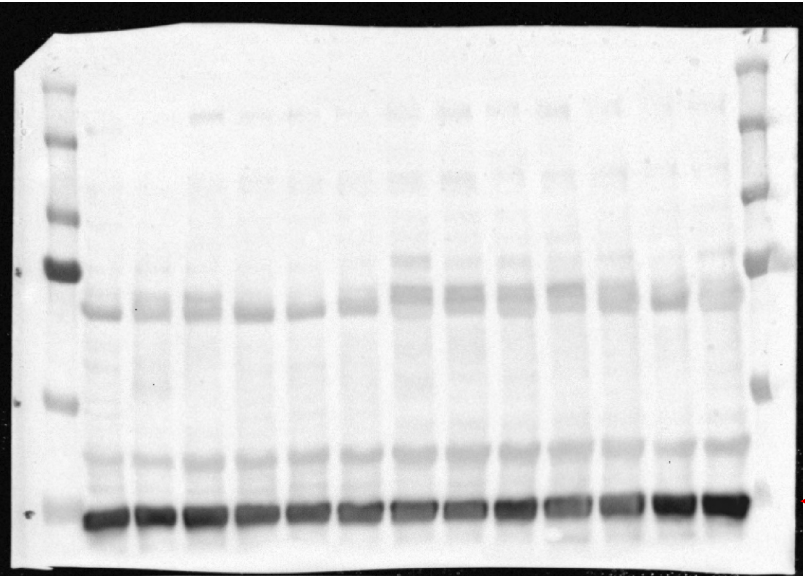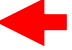

**Full unedited Western Blots for Figure 7D**

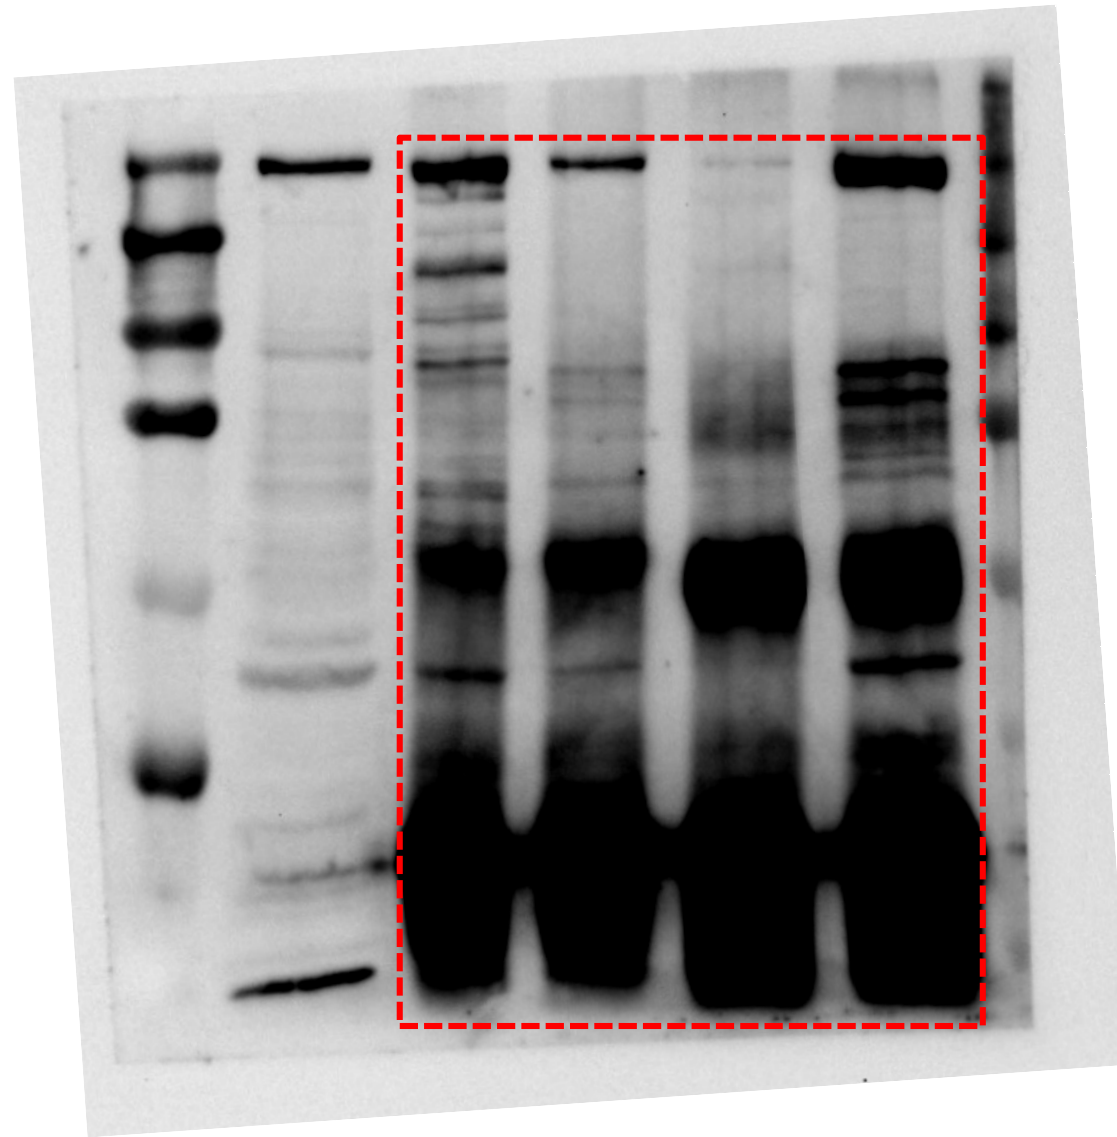

# Full unedited Western Blots for Figure 7E

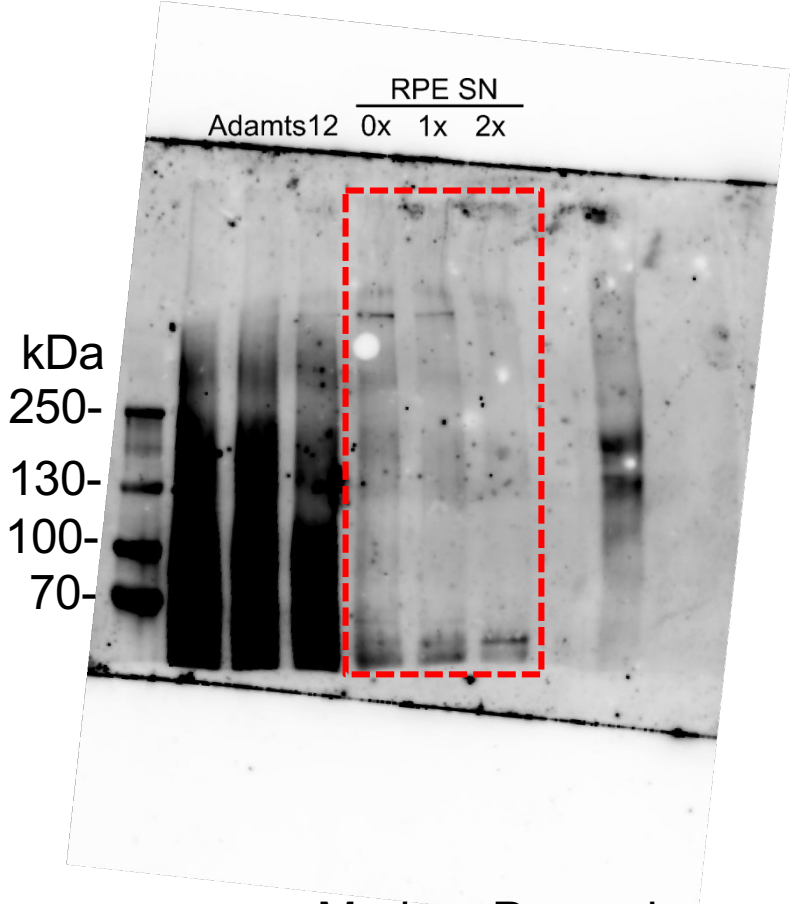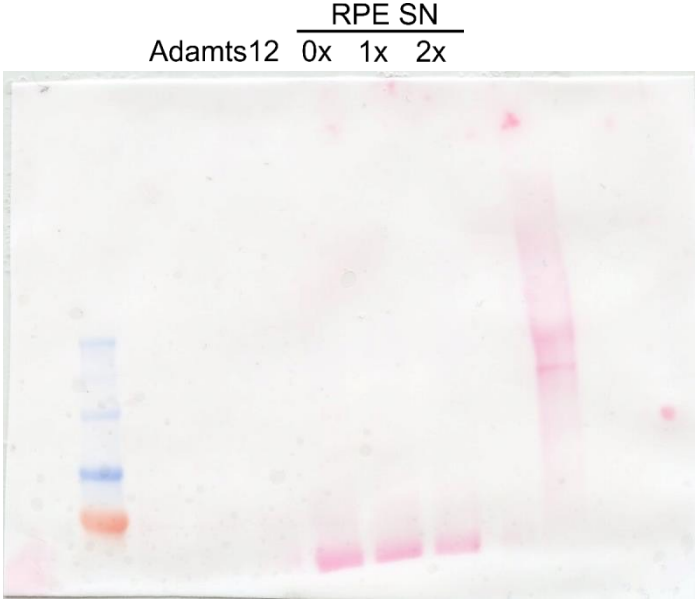

Marker: Pageruler prestained plus + unreduced TG

# Full unedited Western Blots for Supplemental Figure 3B

Anti- $\alpha$ SMA Western Blot

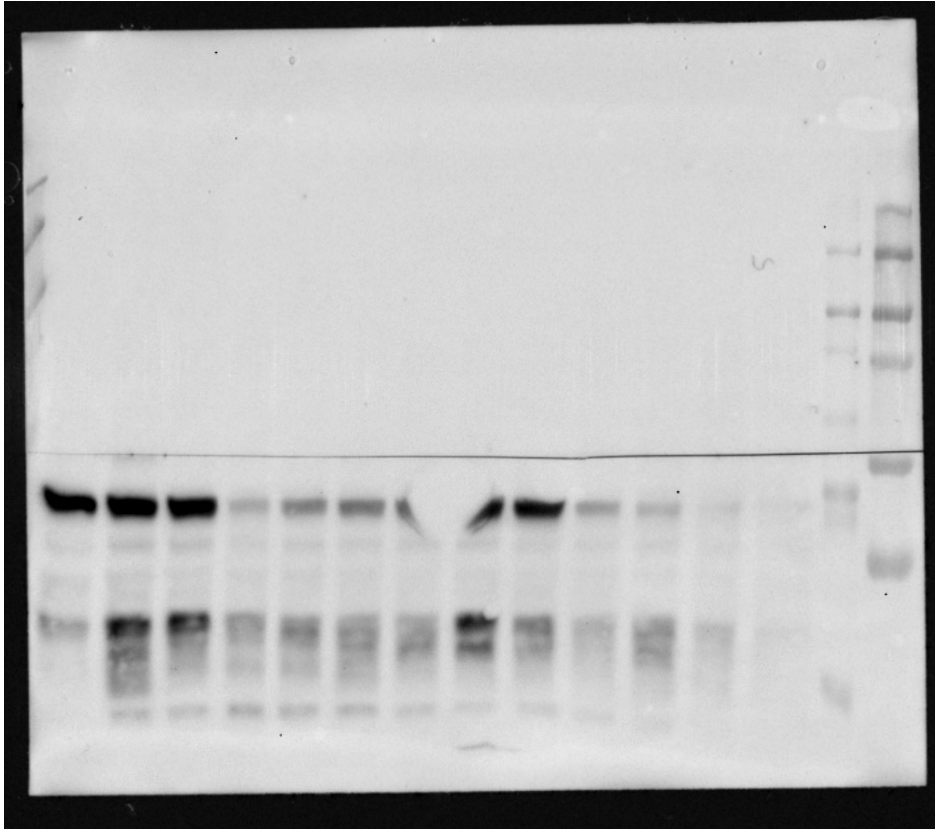

Anti-GAPDH Western Blot

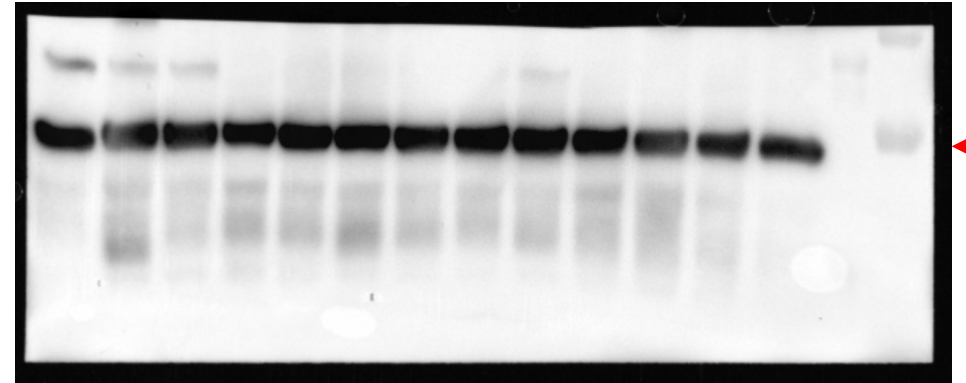

# Full unedited Western Blots for Supplemental Figure 3C

Anti- $\alpha$ SMA Western Blot

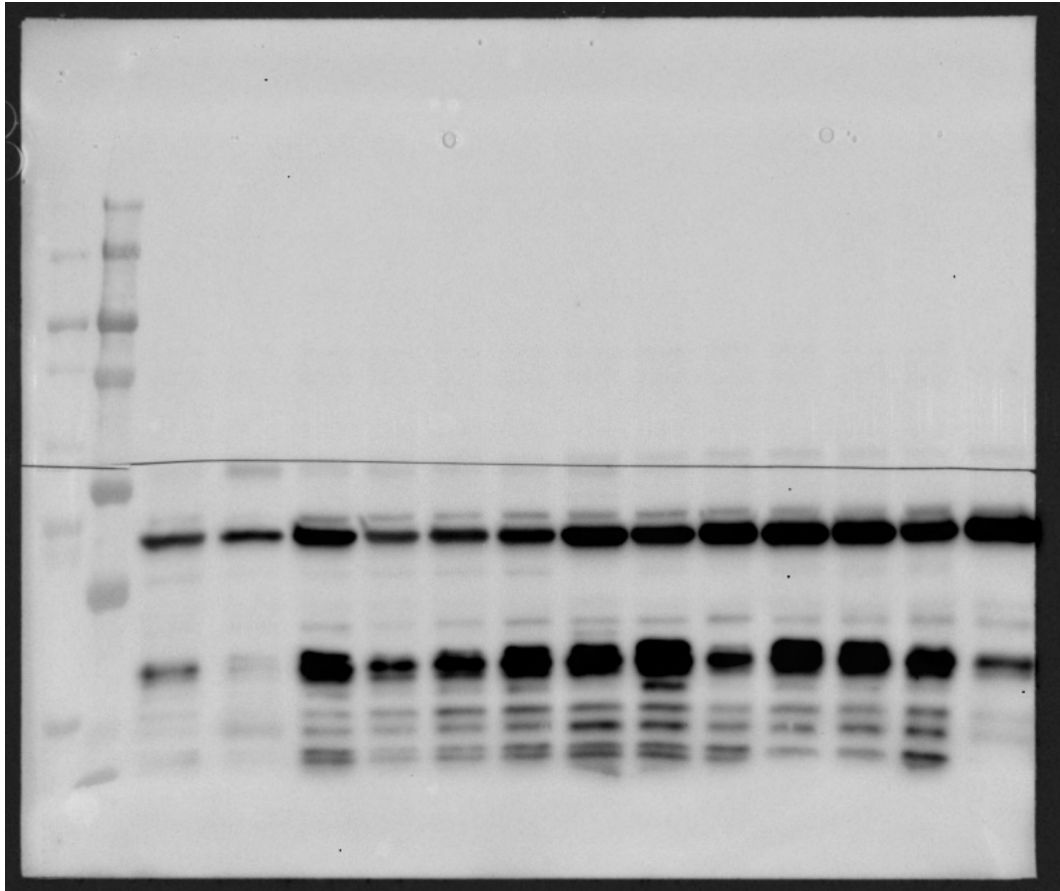

Anti-GAPDH Western Blot

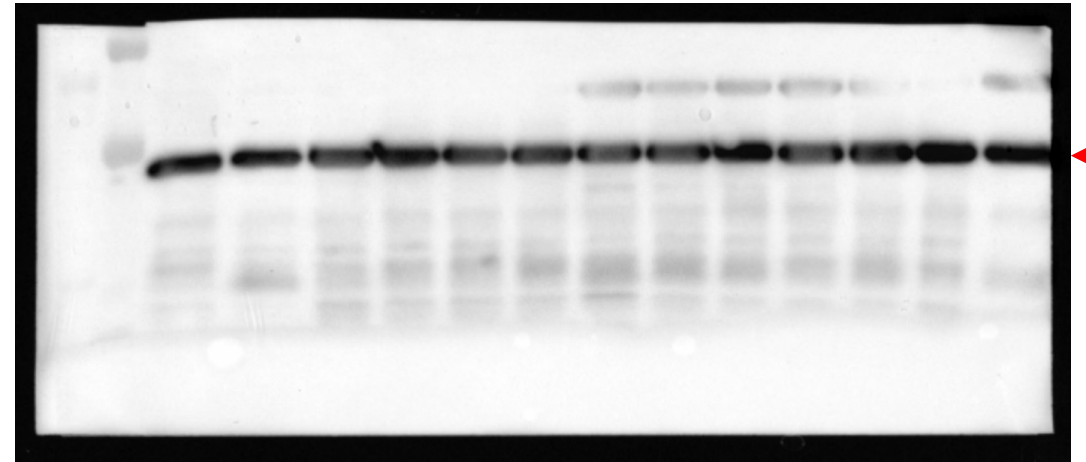

# Full unedited Western Blots for Supplemental Figure 7B

Anti-HA Western Blot

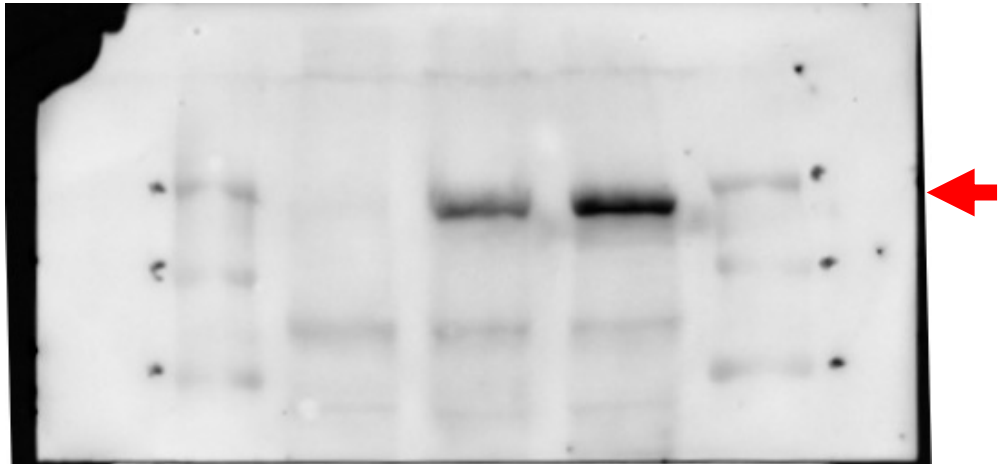

Anti-Tubulin Western Blot

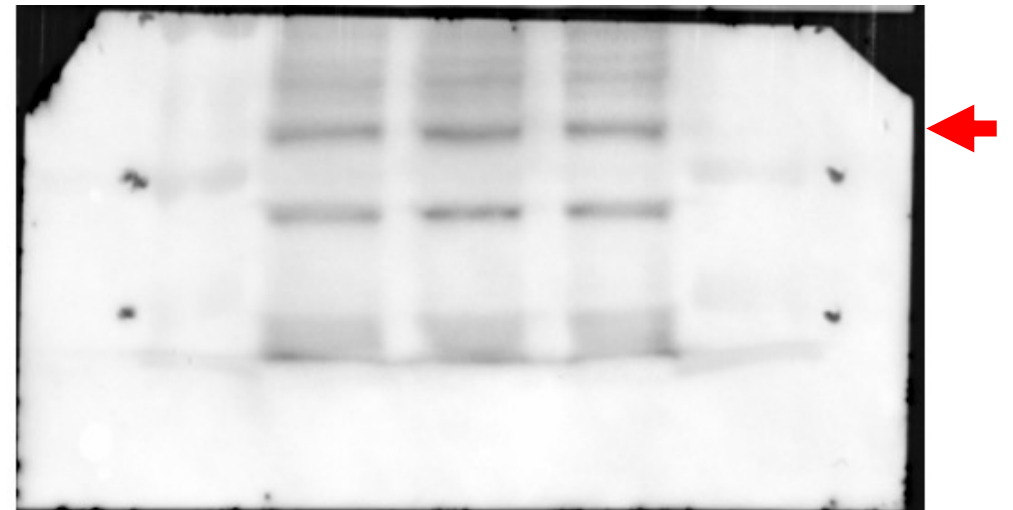

# Full unedited Western Blots for Supplemental Figure 7C

Anti-HA Western Blot

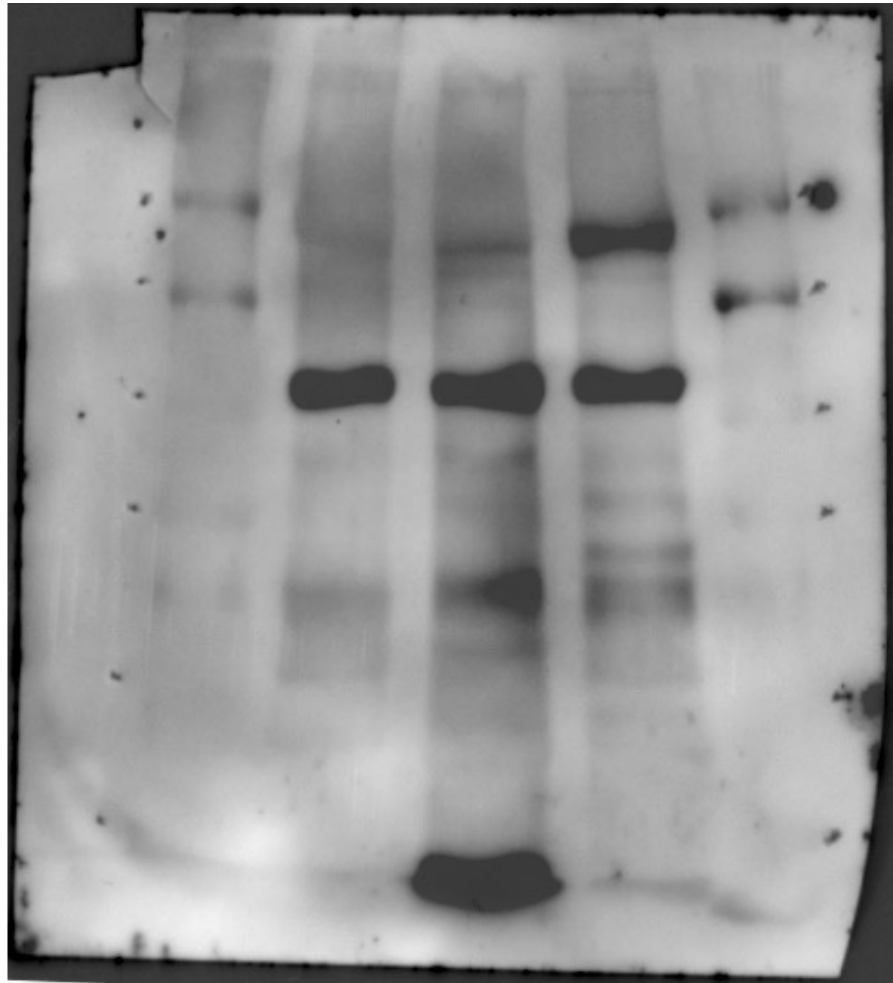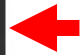

Anti-COMP Western Blot

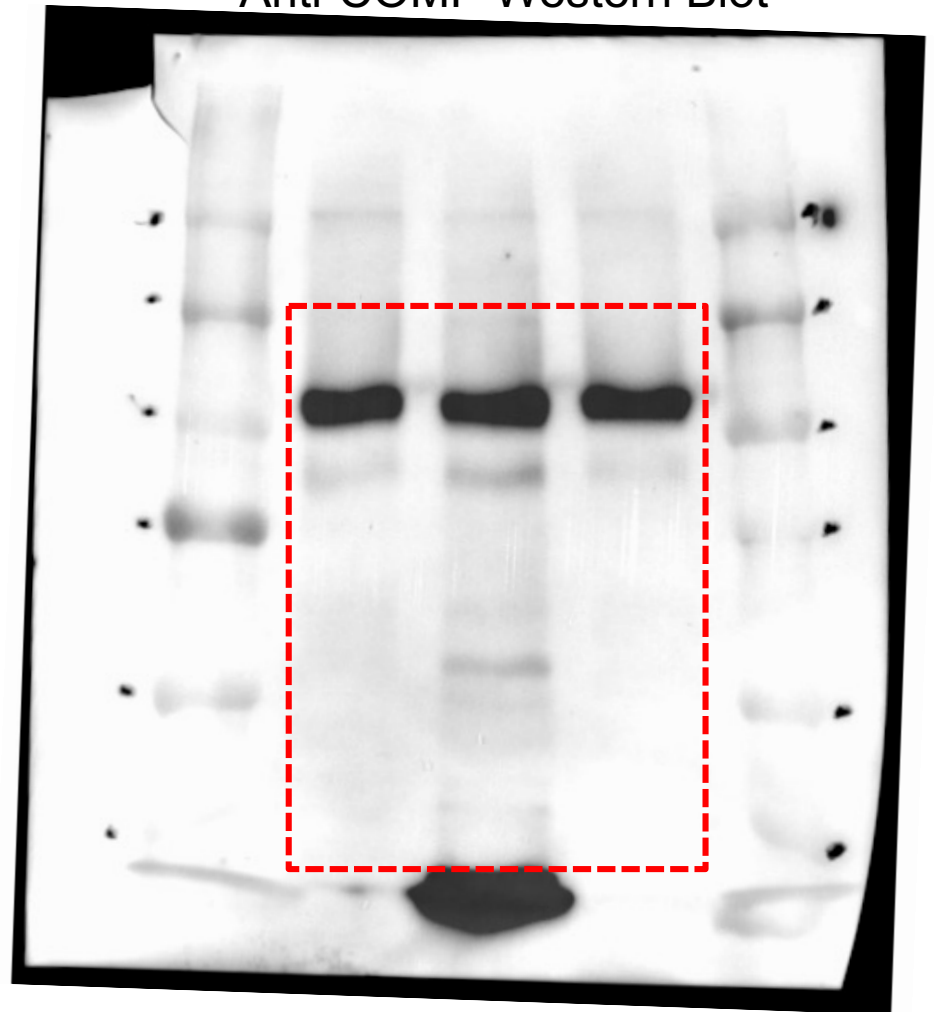



# Full unedited Western Blots for Supplemental Figure 8A

Anti-STAT1 Western Blot

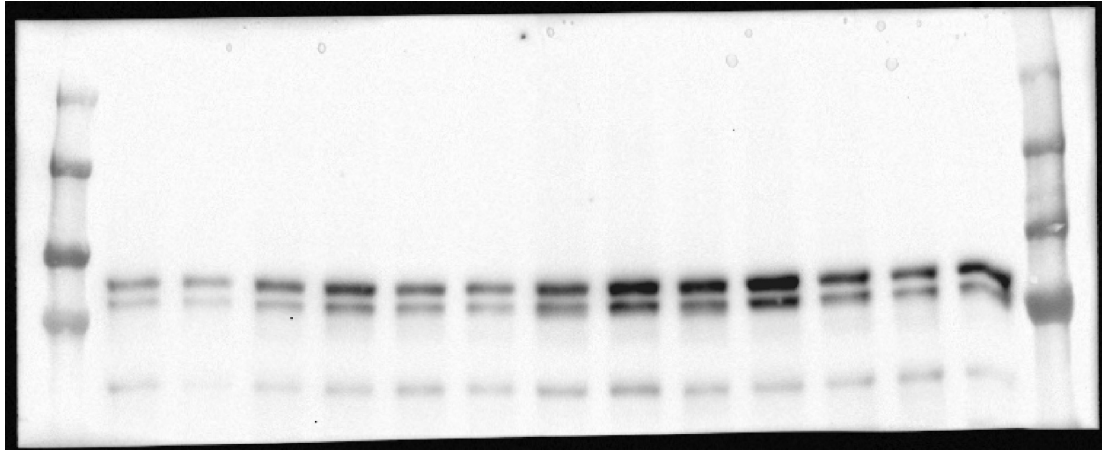

Anti-STAT2 Western Blot

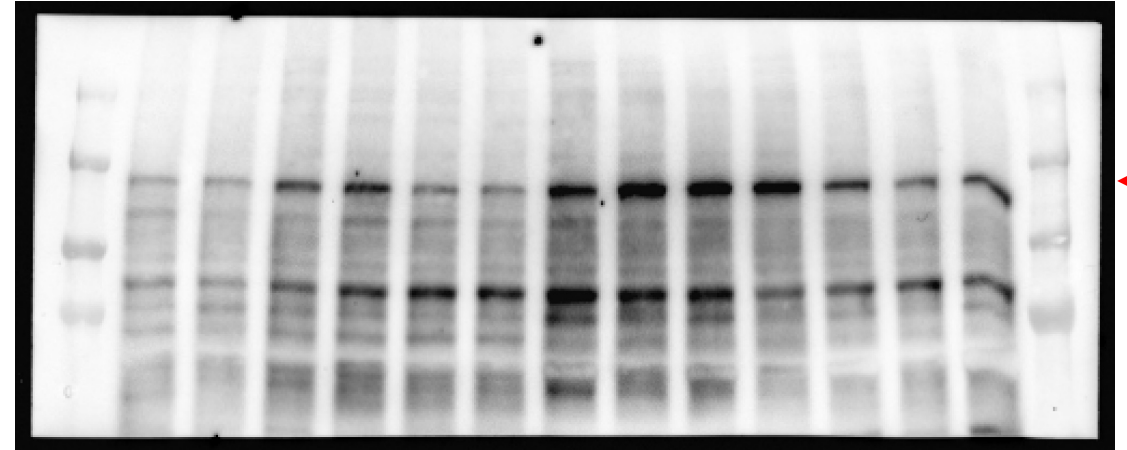

Anti-GAPDH Western Blot

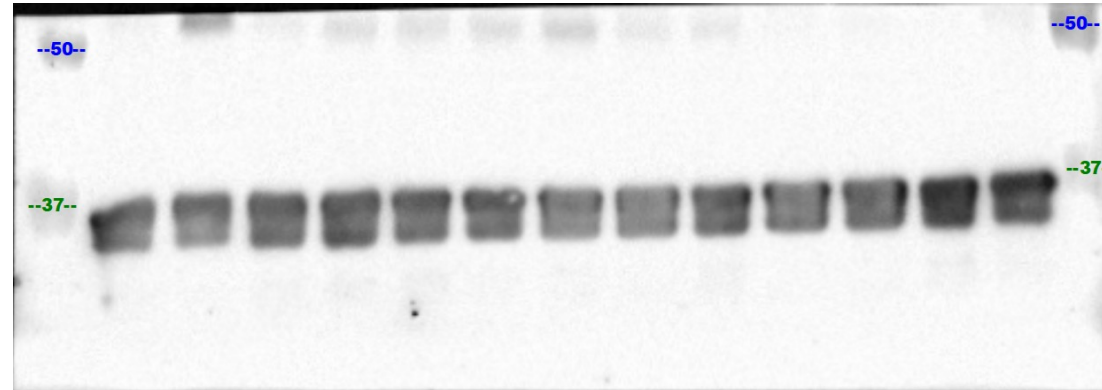

# Full unedited Western Blots for Supplemental Figure 8B

Anti-STAT1 Western Blot

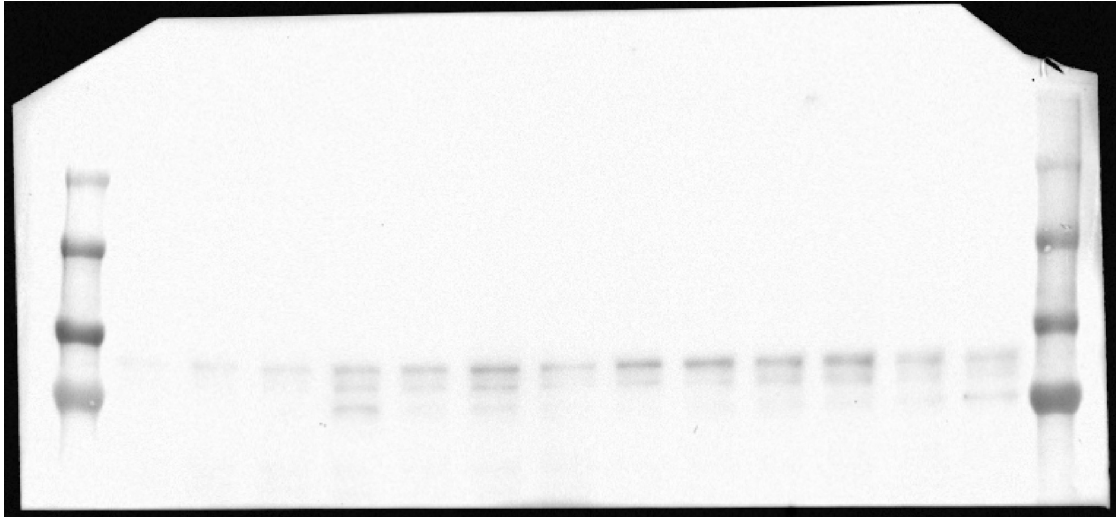

Anti-STAT2 Western Blot

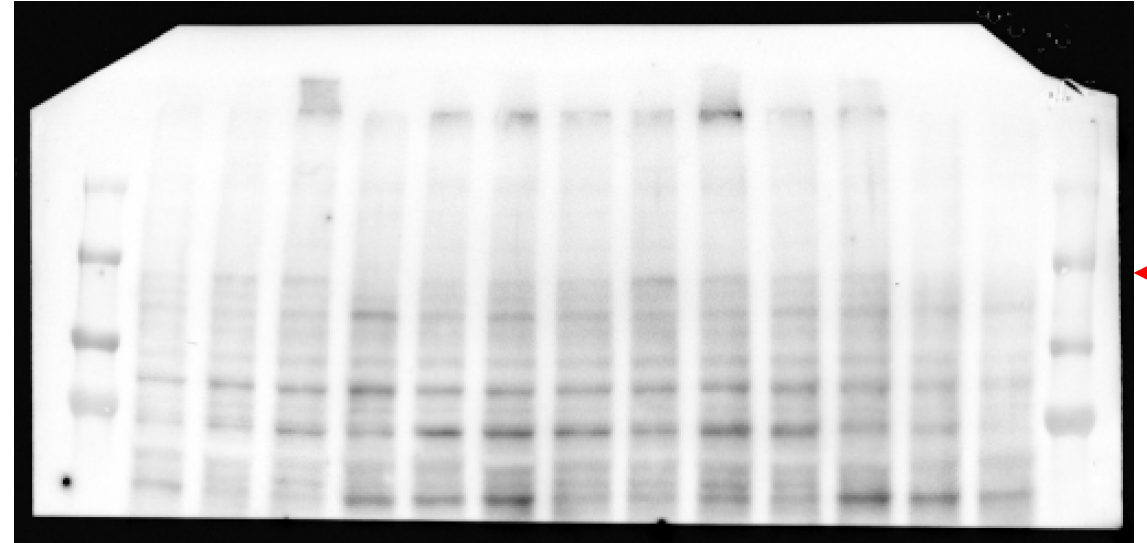

Anti-GAPDH Western Blot

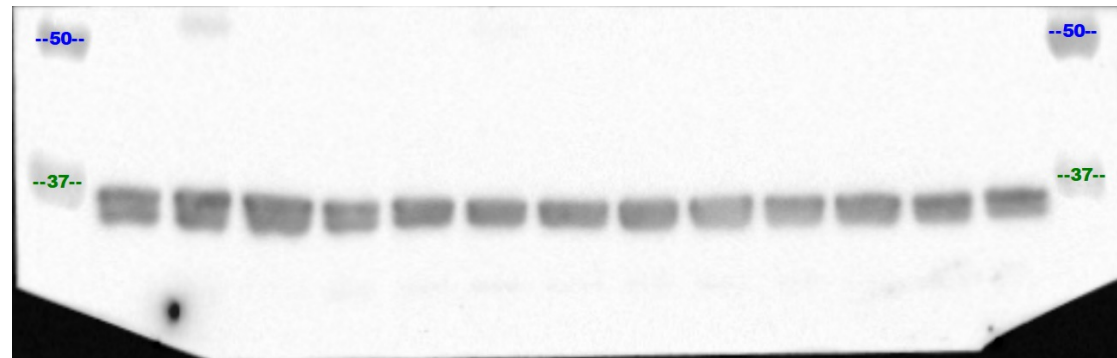

# Full unedited Western Blots for Supplemental Figure 8C

Anti-STAT3 Western Blot

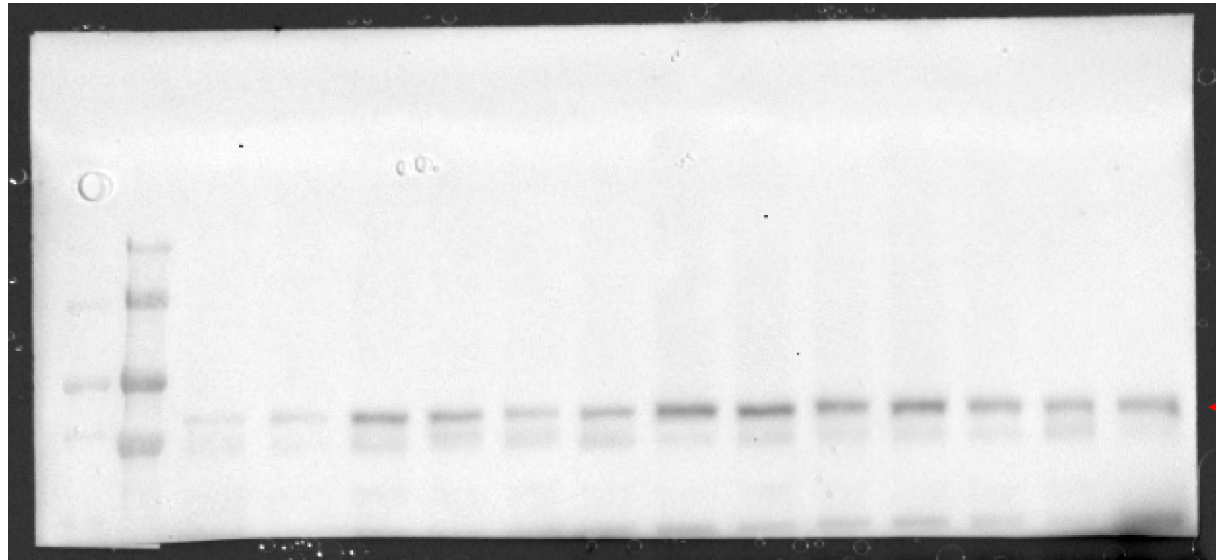

Anti-GAPDH Western Blot

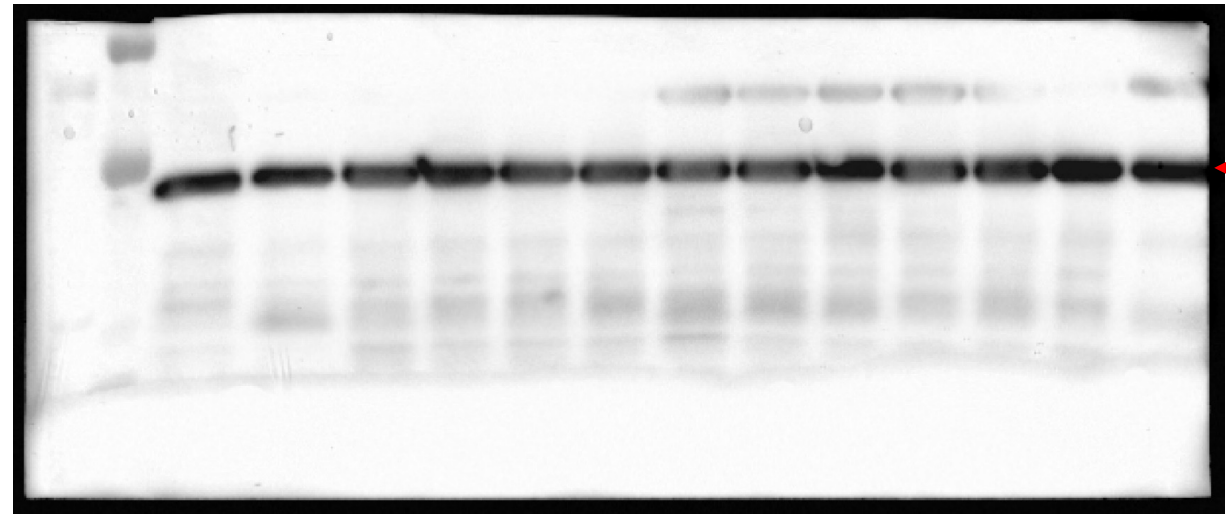

# Full unedited Western Blots for Supplemental Figure 8D

Anti-STAT3 Western Blot

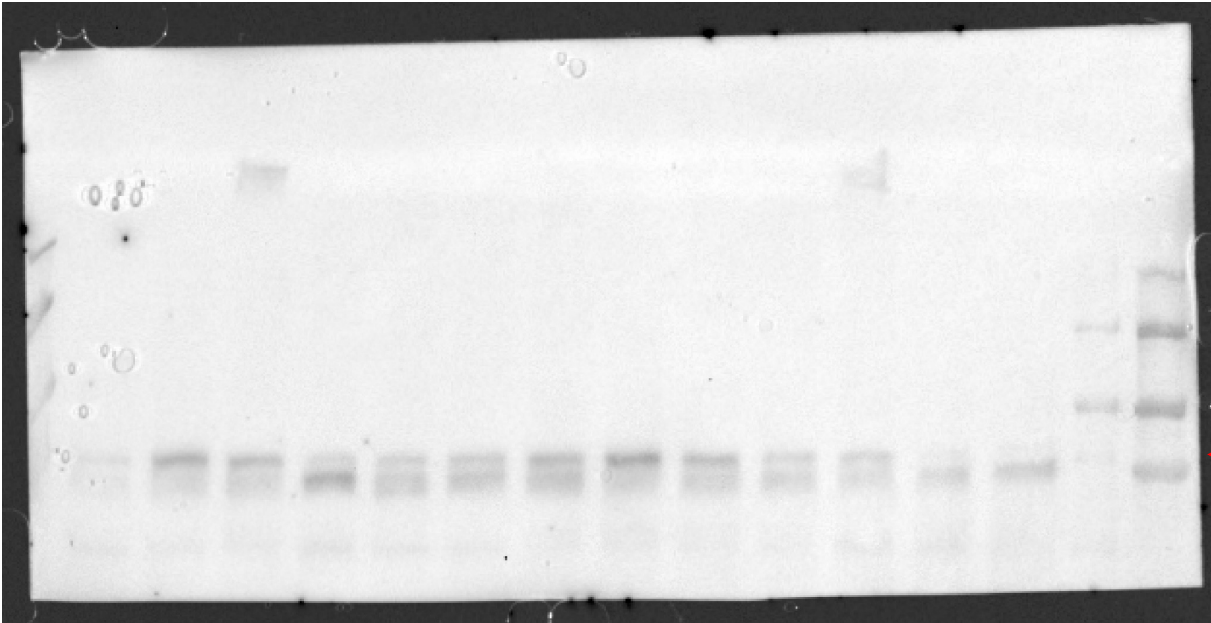

Anti-GAPDH Western Blot

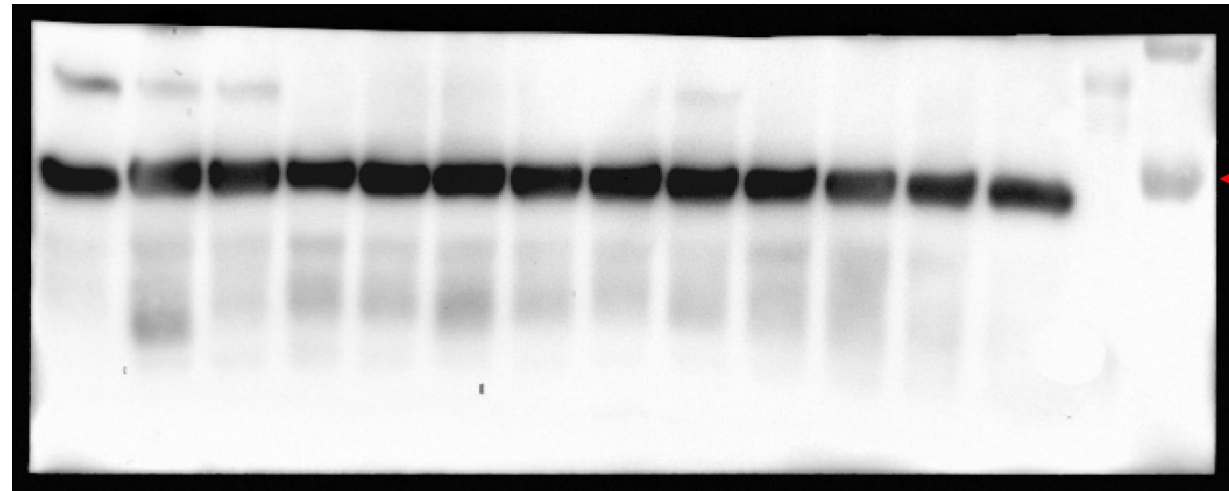

# Full unedited Western Blots for Supplemental Figure 9A

Sham Samples

Anti-COMP Western Blot

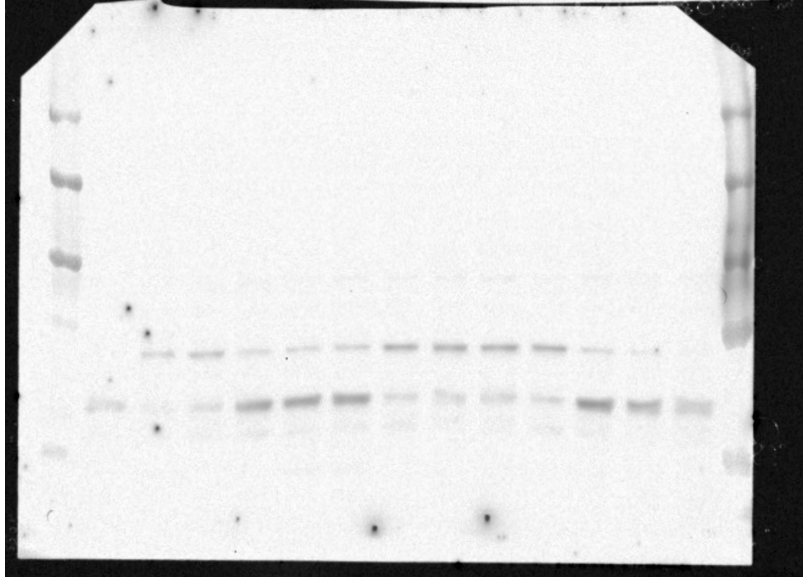

Anti-Tubulin Western Blot

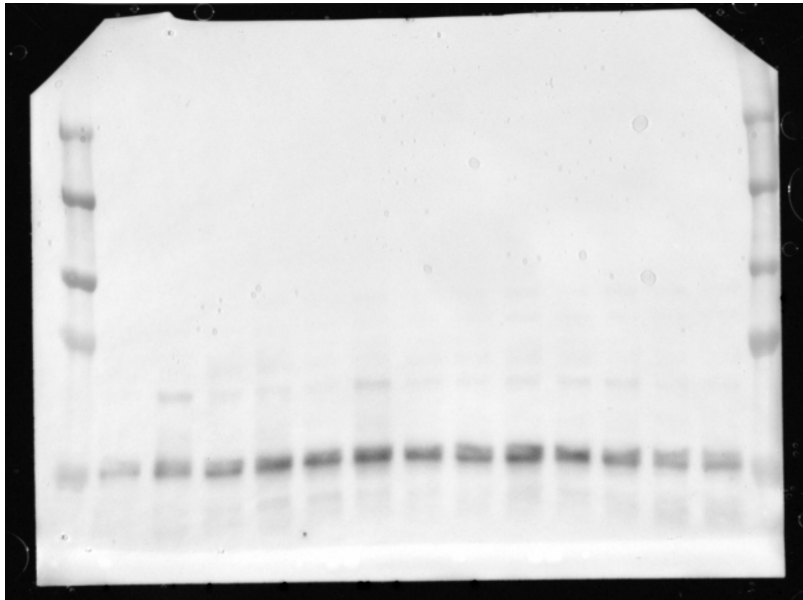

UUO Samples

Anti-COMP Western Blot

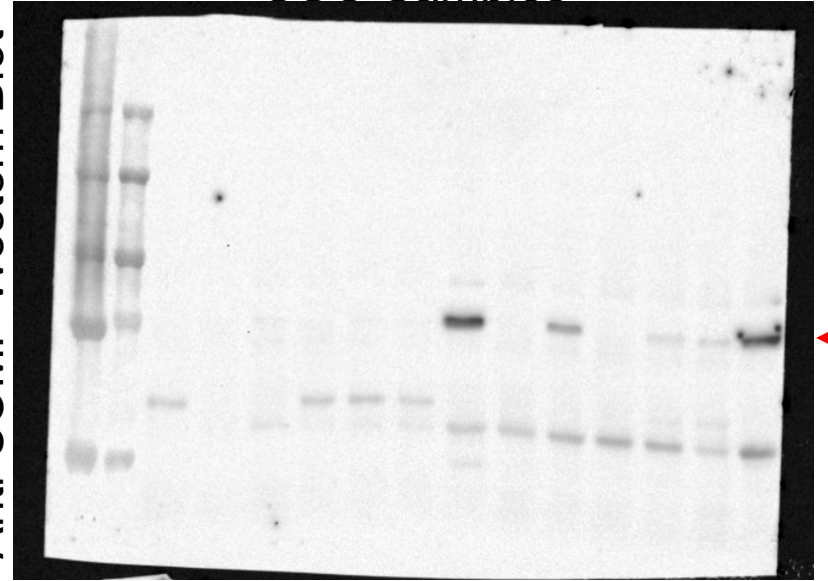

Anti-Tubulin Western Blot

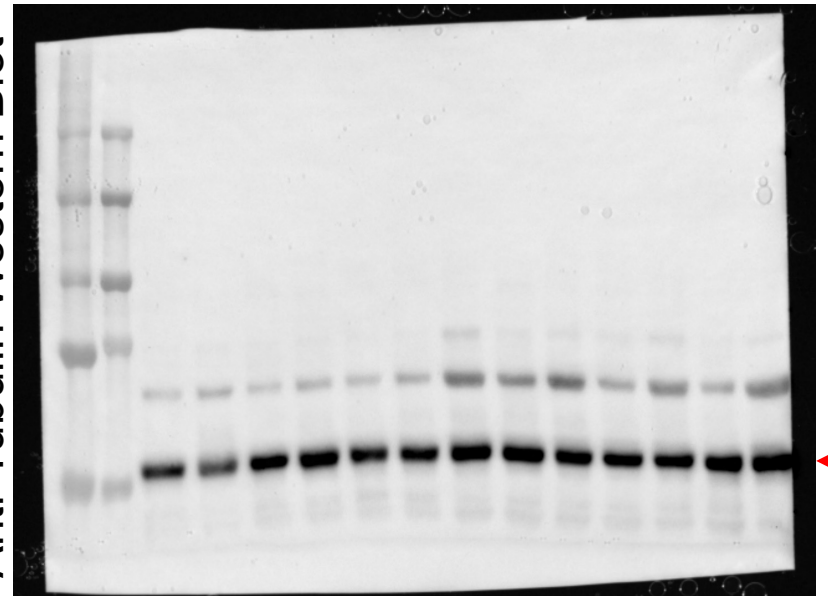

# Full unedited Western Blots for Supplemental Figure 9C

Sham Samples

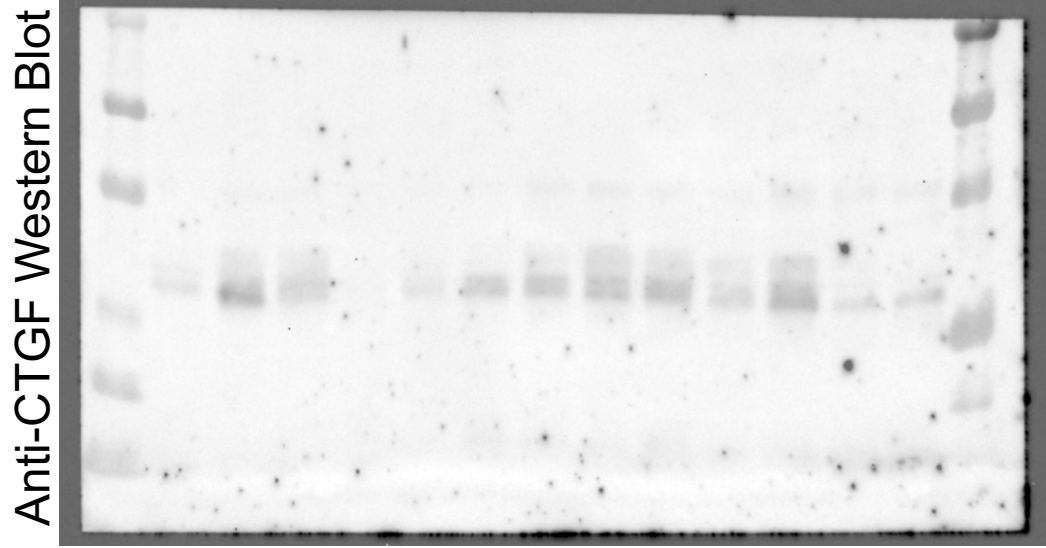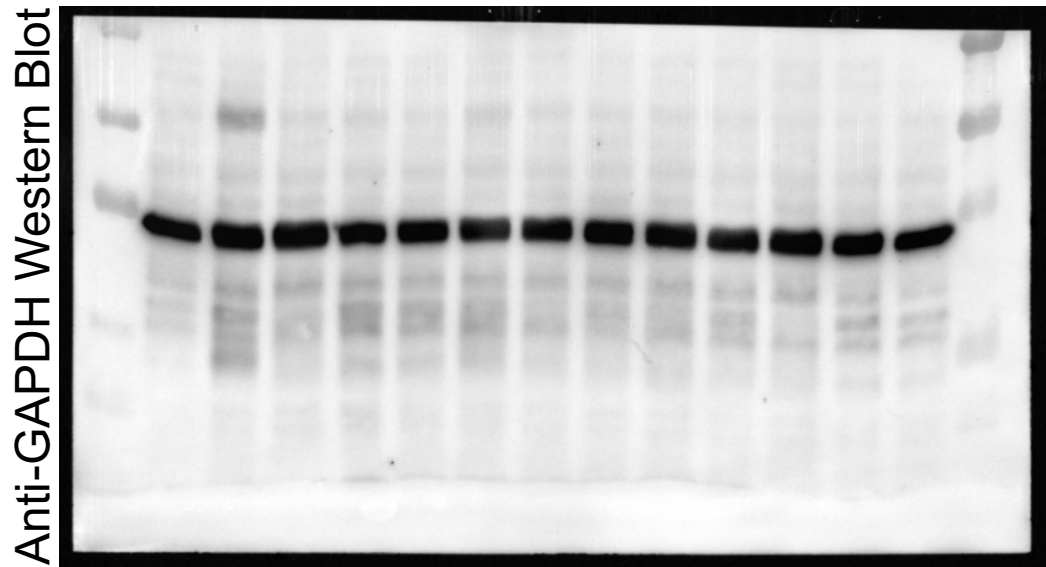

UUO Samples

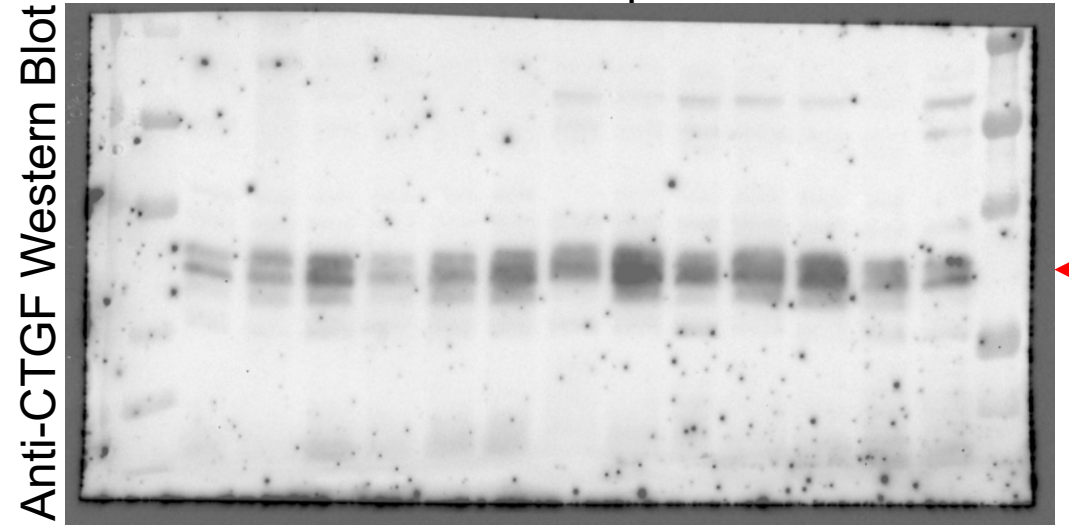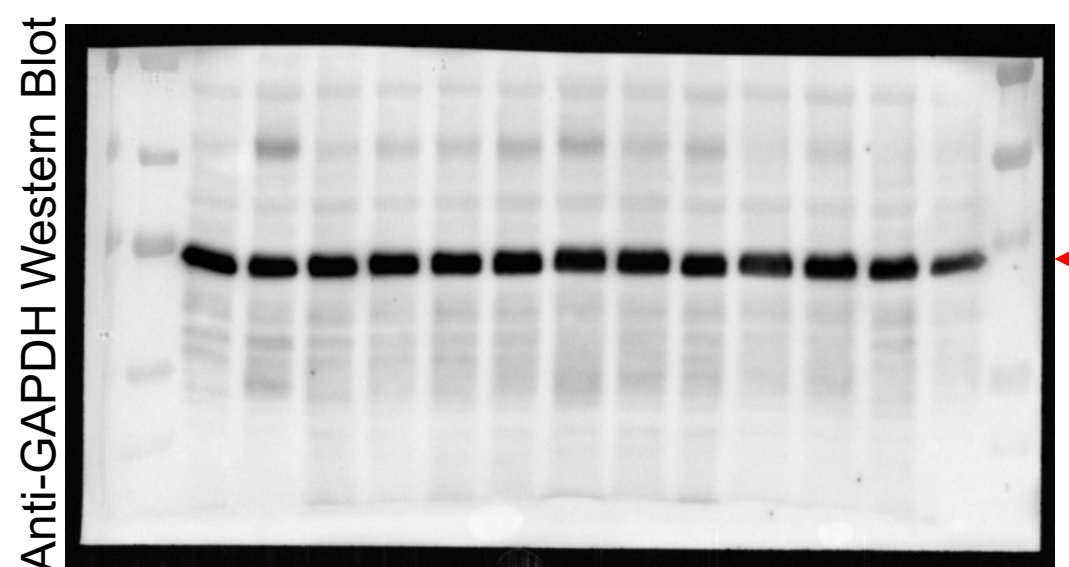

# Full unedited Western Blots for Supplemental Figure 9H

Adamts12      COMP  
                  0x    1x    2x    4x

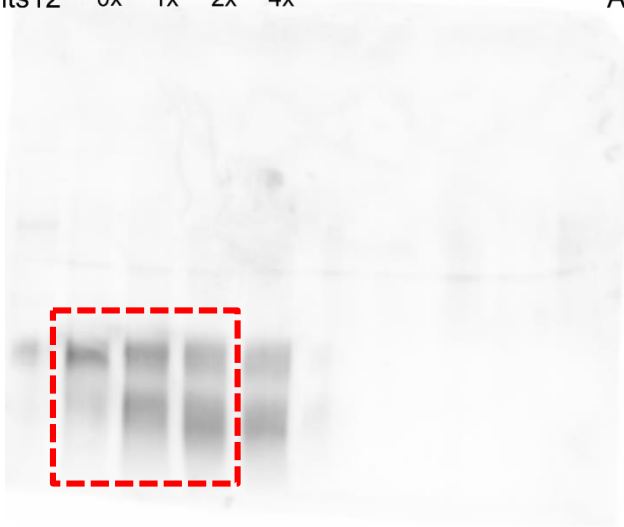

Adamts12      COMP  
                  0x    1x    2x    4x

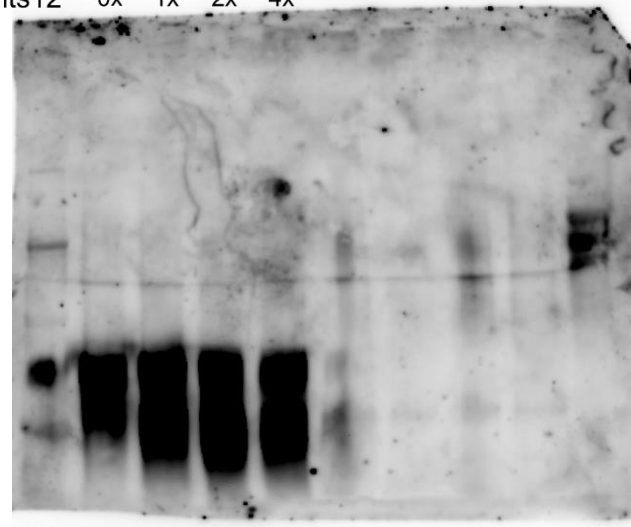

Adamts12      COMP  
                  0x    1x    2x    4x

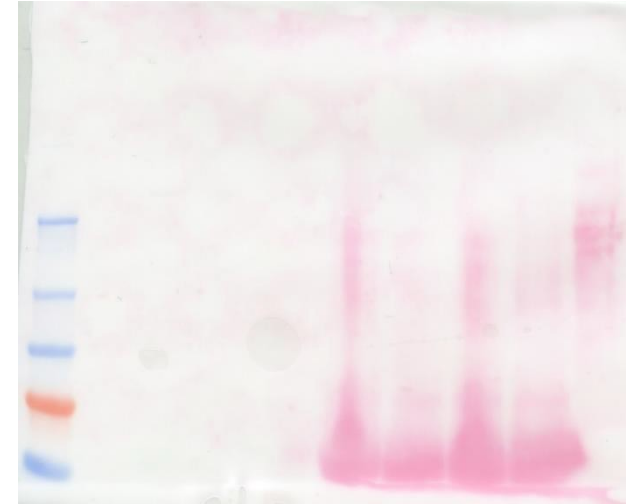

Marker: Pageruler prestained plus + unreduced TG
